# Supplementary material for: DNA Barcoding of Recently Diverged Species: Relative Performance of Matching Methods
Source: PubMed Central journal article supplement (PMC3260286; doi:10.1371/journal.pone.0030490), 2012-01-17
Supplement: pone.0030490.s004.pdf [file pone.0030490.s004.pdf]

**Table S2. Influence of divergence time on species identification success per method compared**

| <b>Species divergence time</b> | <b>NJ (liberal)</b> | <b>NJ (strict)</b> | <b>PAR (liberal)</b> | <b>PAR (strict)</b> | <b>NN</b> | <b>BLAST</b> | <b>DNA-BAR</b> | <b>BLOG</b> |
|--------------------------------|---------------------|--------------------|----------------------|---------------------|-----------|--------------|----------------|-------------|
| old                            | 99.2                | 99.1               | 96.9                 | 96.6                | 99.4      | 99.4         | 99.5           | 98.0        |
| recent                         | 84.5                | 81.7               | 77.5                 | 74.6                | 85.7      | 85.6         | 86.1           | 86.2        |

Species identification success scores (%; N=300) based on query data sets for species that were either recently diverged (divergence times between 98 and 76,621 generations) or old (divergence times between 76,621 and 553,116 generations). NJ = neighbor joining, PAR = parsimony, NN = nearest neighbor.
